# Supplementary material for: Well-Being Parameters and Intention to Leave Current Institution Among Academic Physicians
Source: PubMed Central journal article supplement (PMC10724765; doi:10.1001/jamanetworkopen.2023.47894), 2023-12-15
Supplement: jamanetwopen-e2347894-s002.pdf [file jamanetwopen-e2347894-s002.pdf]

## Data Sharing Statement

Ligibel. Well-Being Parameters and Intention to Leave Current Institution Among Academic Physicians. *JAMA Netw Open*. Published December 15, 2023.

doi:10.1001/jamanetworkopen.2023.47894

### Data

**Data available:** No

### Additional Information

**Explanation for why data not available:** Data sharing agreements with the organizations who participate in the Healthcare Professional Well-being Academic Consortium do not allow us make the data used for this study publicly available.
